# Supplementary material for: Lime and ammonium carbonate fumigation coupled with bio‐organic fertilizer application steered banana rhizosphere to assemble a unique microbiome against Panama disease
Source: PubMed Central journal article supplement (PMC6465235; doi:10.1111/1751-7915.13391), 2019-03-05
Supplement: MBT2-12-515-s007.pdf [file MBT2-12-515-s007.pdf]

## **Microbial Biotechnology**

### **Electronic supplementary material**

#### **Lime and ammonium carbonate fumigation coupled with bio-organic fertilizer application steered banana rhizosphere to assemble a unique microbiome against Panama disease**

Zongzhuan Shen<sup>1</sup>, Beibei Wang<sup>2</sup>, Jiabin Zhu<sup>1</sup>, Hangwei Hu<sup>3</sup>, Chengyuan Tao<sup>1</sup>, Yannan Ou<sup>1</sup>, Xuhui Deng<sup>1</sup>, Ning Ling<sup>1</sup>, Rong Li<sup>1,4,\*</sup>, Qirong Shen<sup>1</sup>

<sup>1</sup> Jiangsu Provincial Key Lab of Solid Organic Waste Utilization, Jiangsu Collaborative Innovation Center of Solid Organic Wastes, Educational Ministry Engineering Center of Resource-saving fertilizers, Nanjing Agricultural University, Nanjing 210095, Jiangsu, P. R. China

<sup>2</sup> Hainan key Laboratory for Sustainable Utilization of Tropical Bio-resources, Institute of Tropical Agriculture and Forestry, Hainan University, 570228 Haikou, P. R. China

<sup>3</sup> Faculty of Veterinary and Agricultural Sciences, University of Melbourne, Melbourne, Victoria 3010, Australia

<sup>4</sup> Ecology and Biodiversity Group, Department of Biology, Institute of Environmental Biology, Utrecht University, Utrecht, Netherlands

\* Corresponding author: College of Resources and Environmental Sciences, Nanjing Agricultural University, 210095, Nanjing, China. E-mail: lirong@njau.edu.cn. Tel: (86)02584395535. Fax: (86)02584395535.

**Fig. S1** Sketch map for each season of the two seasonal greenhouse experiments.

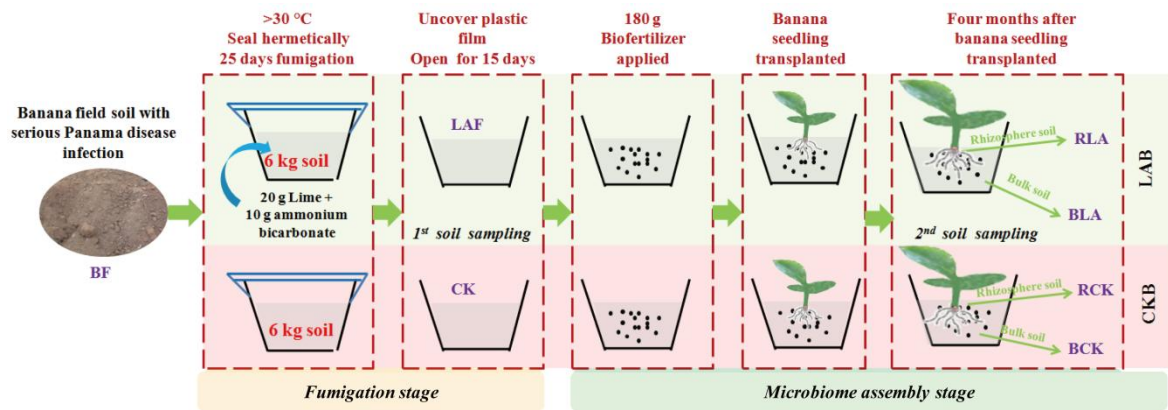

**Fig. S2** Heatmap displaying the abundance of dominated bacterial phyla in each soil sample. Numbers in each cell represent the mean relative abundance of each phylum.

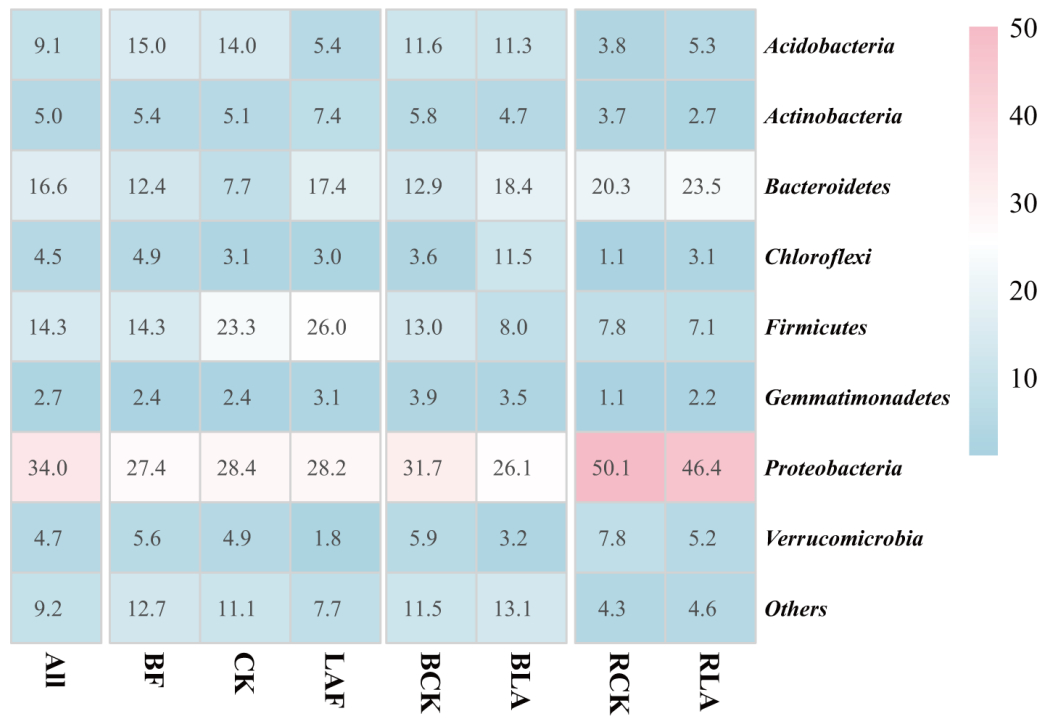

**Fig. S3** Spearman correlations between the abundance of *F. oxysproum* quantified by qPCR with the phylogenetic relatedness of based on nearest net relatedness (NRI) (a) and nearest taxon index (NTI) (b) in bacterial community.

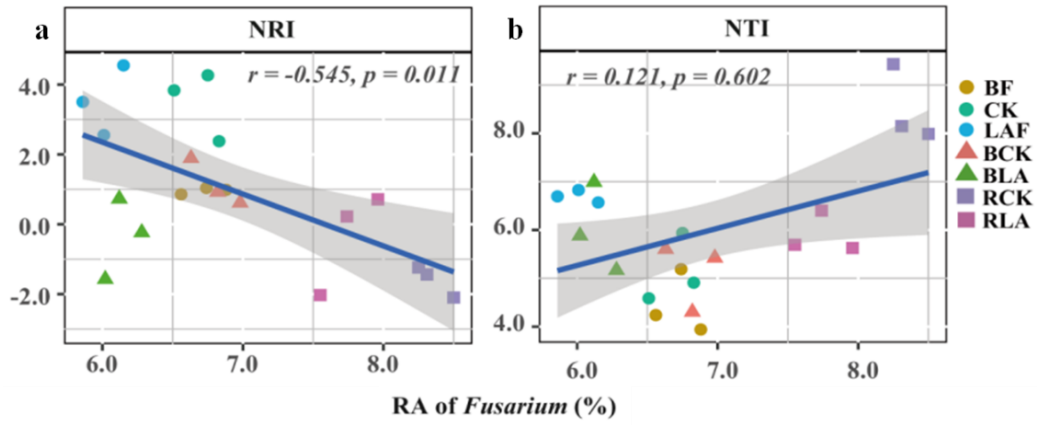

**Fig. S4** Boxplot of the relative abundance of OTU10 (*Rhizobium*), OTU120 (*Gemmatimonas*), OTU130 (*Flavobacterium*), OTU14 (*Pseudomonas*), OTU277 (*Lysobacter*), and OTU2915 (*Sphingomonas*) for each soil sample. Different letters indicate a significant difference ( $p < 0.05$ ) according to two independent sample t-test or ANOVA analysis.

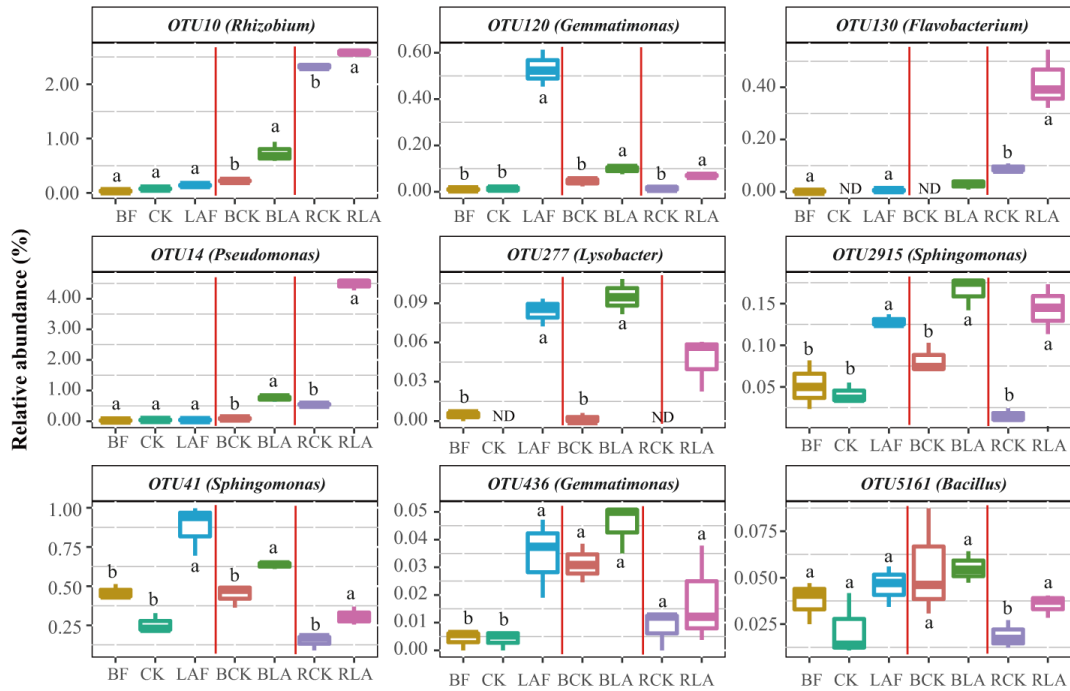

**Table S1** Number of sequences and OTUs from rawdata and processed final good quality sequences that were used to further analysis after basic quality control for different treatments.

| Sample | Rawdata          |             | Final            |             |
|--------|------------------|-------------|------------------|-------------|
|        | No. of sequences | No. of OTUs | No. of sequences | No. of OTUs |
| BF1    | 19,286           | 3,179       | 16,999           | 2,787       |
| BF2    | 10,986           | 2,483       | 9,788            | 2,213       |
| BF3    | 17,668           | 3,095       | 16,007           | 2,725       |
| BCK1   | 14,543           | 2,596       | 13,001           | 2,330       |
| BCK2   | 21,679           | 3,107       | 19,457           | 2,620       |
| BCK3   | 18,210           | 2,899       | 16,269           | 2,551       |
| BLA1   | 18,852           | 2,293       | 17,133           | 2,034       |
| BLA2   | 28,063           | 2,650       | 25,349           | 2,213       |
| BLA3   | 26,859           | 2,651       | 23,956           | 2,218       |
| CK1    | 15,844           | 2,814       | 14,481           | 2,472       |
| CK2    | 20,462           | 3,067       | 18,451           | 2,523       |
| CK3    | 18,481           | 2,880       | 16,794           | 2,531       |
| LAF1   | 24,574           | 2,835       | 23,332           | 2,411       |
| LAF2   | 27,449           | 2,851       | 26,248           | 2,460       |
| LAF3   | 16,807           | 2,412       | 16,055           | 2,147       |
| RCK1   | 11,298           | 1,384       | 11,059           | 1,275       |
| RCK2   | 24,103           | 2,007       | 23,570           | 1,793       |
| RCK3   | 16,704           | 1,670       | 16,404           | 1,521       |
| RLA1   | 27,281           | 2,114       | 26,577           | 1,860       |
| RLA2   | 25,449           | 2,034       | 24,816           | 1,783       |
| RLA3   | 10,809           | 1,375       | 10,577           | 1,259       |
| Total  | 415,407          | 7,580       | 386,323          | 5,448       |

**Table S2** Spearman correlation coefficients and significant *p* value between the relative abundance of *F. oxysproum* with abundant bacterial and fungal phyla.

| Phyla            | r      | <i>p</i> value |
|------------------|--------|----------------|
| Acidobacteria    | -0.374 | 0.095          |
| Actinobacteria   | -0.640 | 0.002          |
| Bacteroidetes    | 0.370  | 0.099          |
| Chloroflexi      | -0.538 | 0.012          |
| Firmicutes       | -0.596 | 0.004          |
| Gemmatimonadetes | -0.669 | 0.001          |
| Proteobacteria   | 0.782  | <0.001         |
| Verrucomicrobia  | 0.827  | <0.001         |
